# Supplementary material for: Optimization and characterization of CLEAs of the very thermostable dimeric peroxidase from Roystonea regia
Source: Royal Society of Chemistry journal article supplement (doi:10.1039/c5ra06464c), 2015-01-01
Supplement: c5ra06464c1.pdf [file c5ra06464c1.pdf]

### **Figure legends**

**Figure 1-S.** SDS-PAGE of the samples of peroxidase

**Figure 2-S.** Pareto chart of the effects of peroxidase CLEA preparation using ethanol as precipitant agent ( $p < 0.1$ ). X1, precipitant concentration; X2, glutaraldehyde concentration; X3, reaction time. Experimental data and conditions are described in methods.

**Figure 3-S.** Pareto chart of the effects of peroxidase CLEA preparation using PEG as precipitant agent ( $p < 0.1$ ). X1, precipitant concentration; X2, glutaraldehyde concentration; X3, reaction time. Experimental data and conditions are described in methods.

**Figure 4-S.** Contour plots for specific activity of peroxidase CLEA preparation using ethanol as precipitant agent. Precipitant concentration was fixed at the level 1.

**Figure 5-S.** Contour plots for specific activity of peroxidase CLEA preparation using PEG as precipitant agent. Reaction time was fixed at the level 0.
