# Supplementary material for: Optimization and characterization of CLEAs of the very thermostable dimeric peroxidase from Roystonea regia
Source: Royal Society of Chemistry journal article supplement (doi:10.1039/c5ra06464c), 2015-01-01
Supplement: c5ra06464c2.pdf [file c5ra06464c2.pdf]

**Table 1S. Purification of Palm Peroxidase from Roystonea regia leaves**

| Purification Step                   | Enzyme Activity (U/mL) | Volume (mL) | Protein Concentration (mg/mL) | Enzyme Activity (U) | Protein mass (mg) | Specific Activity (U/mg) | Yield (%) | Purification fold |
|-------------------------------------|------------------------|-------------|-------------------------------|---------------------|-------------------|--------------------------|-----------|-------------------|
| Vegetable Soluble Extract           | 40.7                   | 200         | 0.19                          | 8140.0              | 38.0              | 214.2                    | 100       | 1                 |
| Ammonium sulphate/PEG Precipitation | 79.9                   | 100         | 0.24                          | 7990.0              | 24.0              | 332.9                    | 98.2      | 1.55              |
| Ultrafiltration (MW 30 kD)          | 102.7                  | 46          | 0.30                          | 4724.2              | 13.8              | 342.3                    | 58.0      | 1.60              |

PEROXIDASE

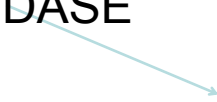

200  
150  
120  
100  
85  
70  
60  
50  
40  
30





**Figure 4-S**

**Figure 5-S**
